# Supplementary material for: Drosophila Pico and Its Mammalian Ortholog Lamellipodin Activate Serum Response Factor and Promote Cell Proliferation
Source: PubMed Central journal article supplement — Dev Cell. 2008 Nov 11;15(5-2):680–90. doi: 10.1016/j.devcel.2008.09.020 (PMC2691947; doi:10.1016/j.devcel.2008.09.020), 2008-11-11
Supplement: NIHMS5027-supplement-Supplemental.pdf [file NIHMS5027-supplement-Supplemental.pdf]

## Supplemental Data

***Drosophila* Pico and Its Mammalian Ortholog****Lamellipodin Activate Serum Response Factor****and Promote Cell Proliferation**

Ekaterina Lyulcheva, Eleanor Taylor, Magdalene Michael,<sup>3</sup> Anne Vehlow, Shengjiang Tan, Adam Fletcher, Matthias Krause, and Daimark Bennett

**SUPPLEMENTAL EXPERIMENTAL PROCEDURES****Fly Strains**

Transgenes and mutations used were as follows: *UAS-Ras85D<sup>V12</sup>* (Lee et al., 1996); *UAS-E2F* and *UAS-Dp* (Neufeld et al., 1998); *MS1096-GAL4* (Capdevila and Guerrero, 1994); *en-GAL4*, *UAS-GFP* (Neufeld et al., 1998); *ptc-GAL4*, *UAS-GFP* (Brennecke et al., 2003). Descriptions of other strains can be found on Flybase (<http://flybase.bio.indiana.edu/>).

To make *FRT pico<sup>kl</sup>* for mosaic analysis, we recombined *RS(5-HA-1907)* at 20B1 (Ryder et al., 2004) with *pico<sup>kl</sup>* and resolved the double *FRT* to a single site by *FLP*-mediated site-directed recombination. A similar strategy was used to generate *FRT20B Ubi-GFP*, *FRT20B tub-GAL80* and *FRT20B +*. *FRT* sites were verified by PCR and sequencing. Positively marked clones were made by crossing *FRT20B tub-GAL80/Y; Act5C-GAL4 UAS-GFP* to *FRT20B pico<sup>kl</sup>/FM7c; hsFLP* and to *FRT20B +; hsFLP*.

The genotypes of the animals described in the paper are listed below.

**Figure Genotypes**

- 1C. *pico<sup>kl</sup>/Y*  
*FM7, Ubi-GFP/Y*
- 1D. *FRT20B, tub-GAL80/ FRT20B, +; A>y>GAL4, UAS-GFP / hsFLP*
- 1E. *FRT20B, tub-GAL80/ FRT20B, pico<sup>kl</sup>; A>y>GAL4, UAS-GFP / hsFLP*
- 2A,C. *tub-GAL4/ TM6, Sb*  
*tub-GAL4/ UAS-pico<sup>IR</sup>*
- 2D. *en-GAL4, UAS-GFP/+; UAS-pico/ TM6B*
- 2E. *en-GAL4, UAS-GFP/+; UAS-pico/ UAS-pico<sup>IR</sup>*
- 2F. *MS1096-GAL4/ Y*
- 2G. *MS1096-GAL4/ Y;; UAS-pico<sup>IR</sup>/ UAS-pico<sup>IR</sup>*
- 2H-J. *en-GAL4, UAS-GFP/+, +/ TM6B*  
*en-GAL4, UAS-GFP/+, +/ UAS-pico<sup>IR</sup>*
- 2K. *hsFLP<sup>122</sup>:: +/A>CD2>GAL4, UAS-GFP<sub>nts</sub>*
- 2L. *hsFLP<sup>122</sup>:: UAS-pico<sup>IR</sup>/ A>CD2>GAL4, UAS-GFP<sub>nts</sub>*
- 3A. *MS1096-GAL4/ Y*
- 3B. *MS1096-GAL4/ Y;; UAS-pico/ UAS-pico*
- 3C-E. *en-GAL4, UAS-GFP/+, +/ TM6B*  
*en-GAL4, UAS-GFP/+, +/ UAS-pico*
- 3F. *hsFLP<sup>122</sup>:: +/A>CD2>GAL4, UAS-GFP<sub>nts</sub>*
- 3G. *hsFLP<sup>122</sup>:: UAS-pico/ A>CD2>GAL4, UAS-GFP<sub>nts</sub>*

- 3H,J. *arm-GAL4/+*  
3I,J. *arm-GAL4/ UAS-pico; +/- UAS-pico*
4. *ptc-GAL4, UAS-GFP/+; UAS-pico<sup>IR</sup>/ +*  
*ptc-GAL4, UAS-GFP/+*  
*ptc-GAL4, UAS-GFP/+; UAS-pico /+*  
*ptc-GAL4, UAS-GFP/UAS-E2F, UAS-DP*  
*ptc-GAL4, UAS-GFP/UAS-E2F, UAS-DP; UAS-pico/+*
- 5A. *MS1096-GAL4/ Y;; MKRS/ +*  
*MS1096-GAL4/ Y;; UAS-pico/+*  
*MS1096-GAL4/ Y; UAS-DN-Egfr/+; UAS-DN-Egfr/ MKRS*  
*MS1096-GAL4/ Y; UAS-DN-Egfr/+; UAS-DN-Egfr/ UAS-pico*
- 5B. *en-GAL4, UAS-GFP/+; UAS-pico/ +*
- 5C. *MS0196-GAL4/Y;; UAS-Egfr/+*  
*MS0196-GAL4/Y*  
*MS0196-GAL4/Y;; UAS-pico/+*
- 5D. *MS0196-GAL4/+;; UAS-Egfr/ MKRS*  
*MS0196-GAL4/ +;; UAS-Egfr/ UAS-pico<sup>IR</sup>*
- 5F. *vg-GAL4/+; UAS-Ras<sup>V12</sup>/ MKRS*  
*vg-GAL4/+; UAS-Ras<sup>V12</sup>/UAS-pico<sup>IR</sup>*
- 5G. *MS1096-GAL4/ Y;; UAS-pico-RA-PH/ +; MKRS/ +*  
*MS1096-GAL4/ Y;; UAS-pico-RA-PH/ +; UAS-pico/ +*
- 5H. *FM7/MS1096-GAL4; UAS-pico-RA-PH/+*  
*pico<sup>k1</sup>/MS1096-GAL4; UAS-pico-RA-PH/+*
- 5I. *hsFLP<sup>122</sup>; A>y>GAL4, UAS-GFP /+; UAS-pico<sup>IR</sup>/ +*  
*hsFLP<sup>122</sup>; A>y>GAL4, UAS-GFP /+; UAS-pico/ +*  
*hsFLP<sup>122</sup>; A>y>GAL4, UAS-GFP /+; UAS-Ras<sup>V12</sup>/ +*
- 6A. *en-GAL4, UAS-GFP/+*  
*en-GAL4, UAS-GFP/+; UAS-pico<sup>IR</sup> /+*  
*en-GAL4, UAS-GFP/+; UAS-pico/+*  
*en-GAL4, UAS-GFP/ ena<sup>210</sup>; UAS-pico/+*  
*en-GAL4, UAS-GFP/+; UAS-Ena/+*
- 6B. *MS0196-GAL4/Y*  
*MS0196-GAL4/Y;; UAS-pico<sup>IR</sup> / +*  
*MS0196-GAL4/Y;; UAS-pico/ +*  
*MS1096-GAL4/Y; UAS-Ena/+*  
*MS0196-GAL4/Y; ena<sup>210</sup>/ +; UAS-pico/ +*  
*MS0196-GAL4/Y; UAS-DN-Egfr/ +; UAS-DN-Egfr/ UAS-pico*
- 6C. *MS1096-GAL4/Y; UAS-pico/ +*  
*MS0196-GAL4/Y; UAS-DN-Egfr/ +; UAS-DN-Egfr/ UAS-pico*
- 6F. *MS0196-GAL4/Y; ena<sup>210</sup>/ +; MKRS/ +*  
*MS0196-GAL4/Y; ena<sup>210</sup>/ +; UAS-pico/ +*  
*MS1096-GAL4/Y;; UAS-pico/ Dr*  
*MS1096-GAL4/Y;; UAS-ena/ MKRS*  
*MS1096-GAL4/Y;; UAS-ena/UAS-pico*  
*MS1096-GAL4/Y;; UAS-ena/ UAS-pico<sup>IR</sup>*  
*MS1096-GAL4/Y;; UAS-pico<sup>IR</sup>/ Dr*
- 7H. *hsFLP<sup>122</sup>;; +/- A>CD2>GAL4, UAS-GFP<sub>nl</sub>*  
*hsFLP<sup>122</sup>;; UAS-mal-d/ A>CD2>GAL4, UAS-GFP<sub>nl</sub>*  
*MS1096-GAL4/ Y;; MKRS/ +*  
*MS0196-GAL4/ Y;; UAS-mal-d/ +*

*MS0196-GAL4/ Y;; UAS- mal-d/ UAS-pico*  
*MS0196-GAL4/ Y;; UAS- mal-d/ UAS-pico<sup>IR</sup>*  
*MS0196-GAL4/ Y; bs<sup>2</sup>/ +; MKRS/ +*  
*MS0196-GAL4/ Y; bs<sup>2</sup>/ +; UAS-pico/ +*

## SUPPLEMENTAL REFERENCES

Brennecke, J., Hipfner, D.R., Stark, A., Russell, R.B., and Cohen, S.M. (2003). *bantam* encodes a developmentally regulated microRNA that controls cell proliferation and regulates the proapoptotic gene *hid* in *Drosophila*. *Cell* *113*, 25-36.

Capdevila, J., and Guerrero, I. (1994). Targeted expression of the signaling molecule decapentaplegic induces pattern duplications and growth alterations in *Drosophila* wings. *EMBO J* *13*, 4459-4468.

Lee, T., Feig, L., and Montell, D.J. (1996). Two distinct roles for Ras in a developmentally regulated cell migration. *Development* *122*, 409-418.

Neufeld, T.P., de la Cruz, A.F., Johnston, L.A., and Edgar, B.A. (1998). Coordination of growth and cell division in the *Drosophila* wing. *Cell* *93*, 1183-1193.

Ryder, E., Blows, F., Ashburner, M., Bautista-Llacer, R., Coulson, D., Drummond, J., Webster, J., Gubb, D., Gunton, N., Johnson, G., et al. (2004). The DrosDel collection: a set of P-element insertions for generating custom chromosomal aberrations in *Drosophila melanogaster*. *Genetics* *167*, 797-813.

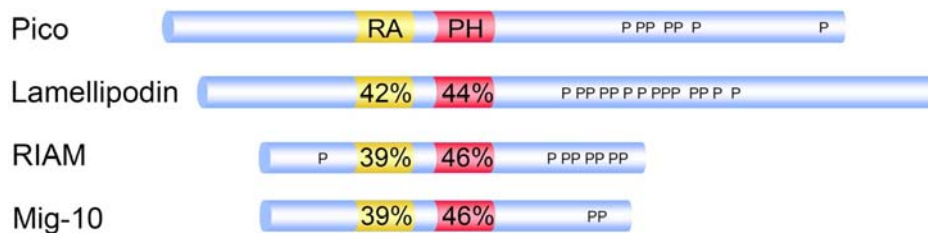

**Figure S1. Domain Alignment and Percentage Homology**

Shown are the domain structures of *Drosophila* Pico, human Lamellipodin, human RIAM and *C.elegans* MIG-10 proteins. All share a central region, containing RA (Ras-association) and PH (Pleckstrin homology) domains, and a number of poly-proline stretches (P). Percentage sequence identities within the RA and PH domains, relative to Pico, are indicated.

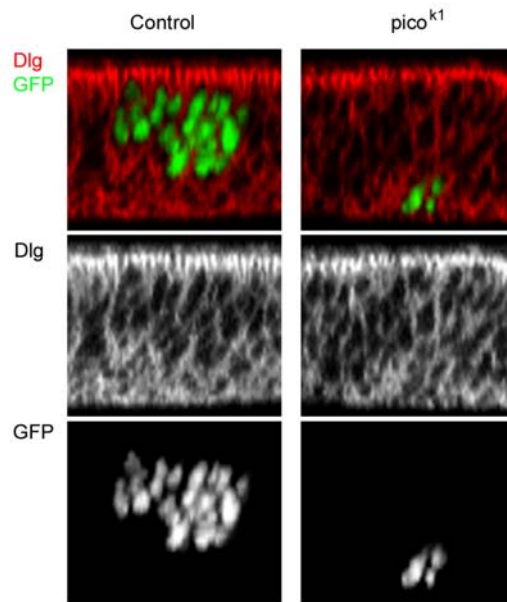

**Figure S2. *pico*<sup>k1</sup> Mutant Clones Are Basally Located in Wing Disc Epithelia**

Compared to wild-type control clones, which are located in apical sections, *pico*<sup>k1</sup> mutant clones are located more basally. Discs were stained with Discs-large, which marks an apical region of lateral membranes. Merged images show Dlg in red and clonal nuclei positively marked with GFP in green.
